# Supplementary material for: Visual percepts evoked with an intracortical 96-channel microelectrode array inserted in human occipital cortex
Source: JCI journal article supplement (doi:10.1172/jci151331), 2021-10-19
Supplement: sd1 [file 1]

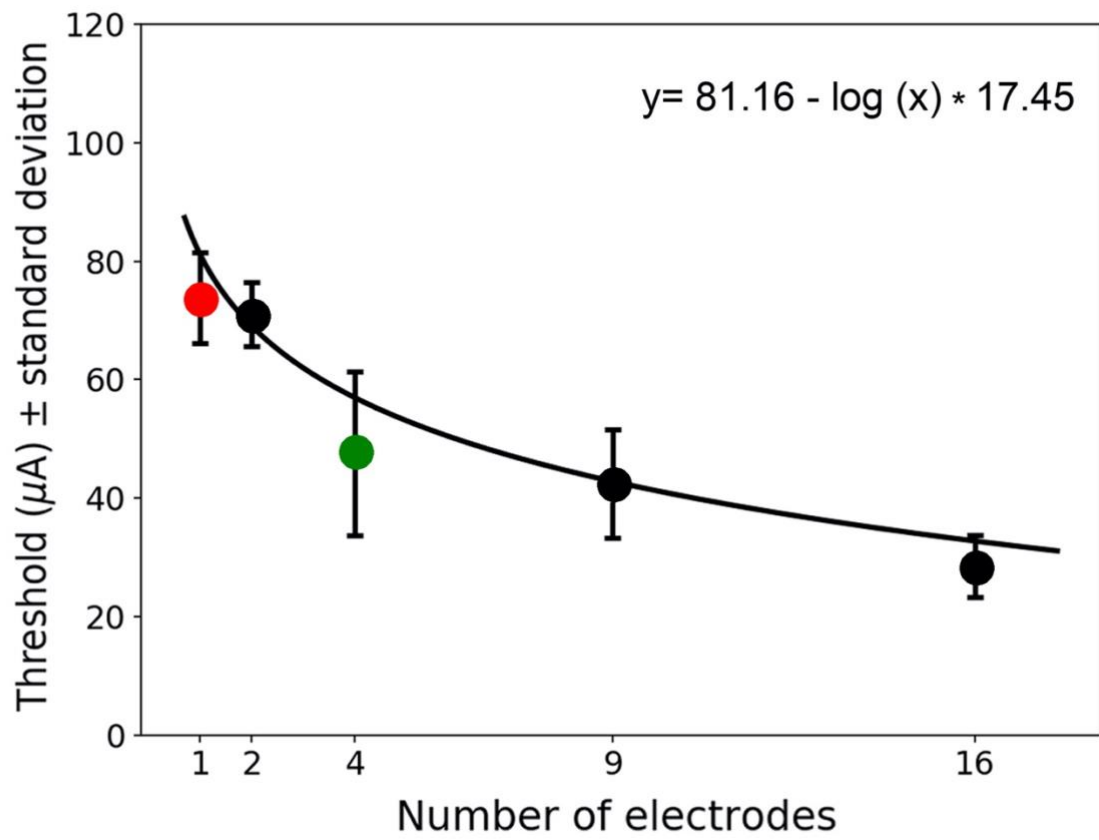

**Supplementary Figure 1.** Mean phosphene thresholds for single electrodes and for groups of 2, 4, 9 and 16 contiguous electrodes.

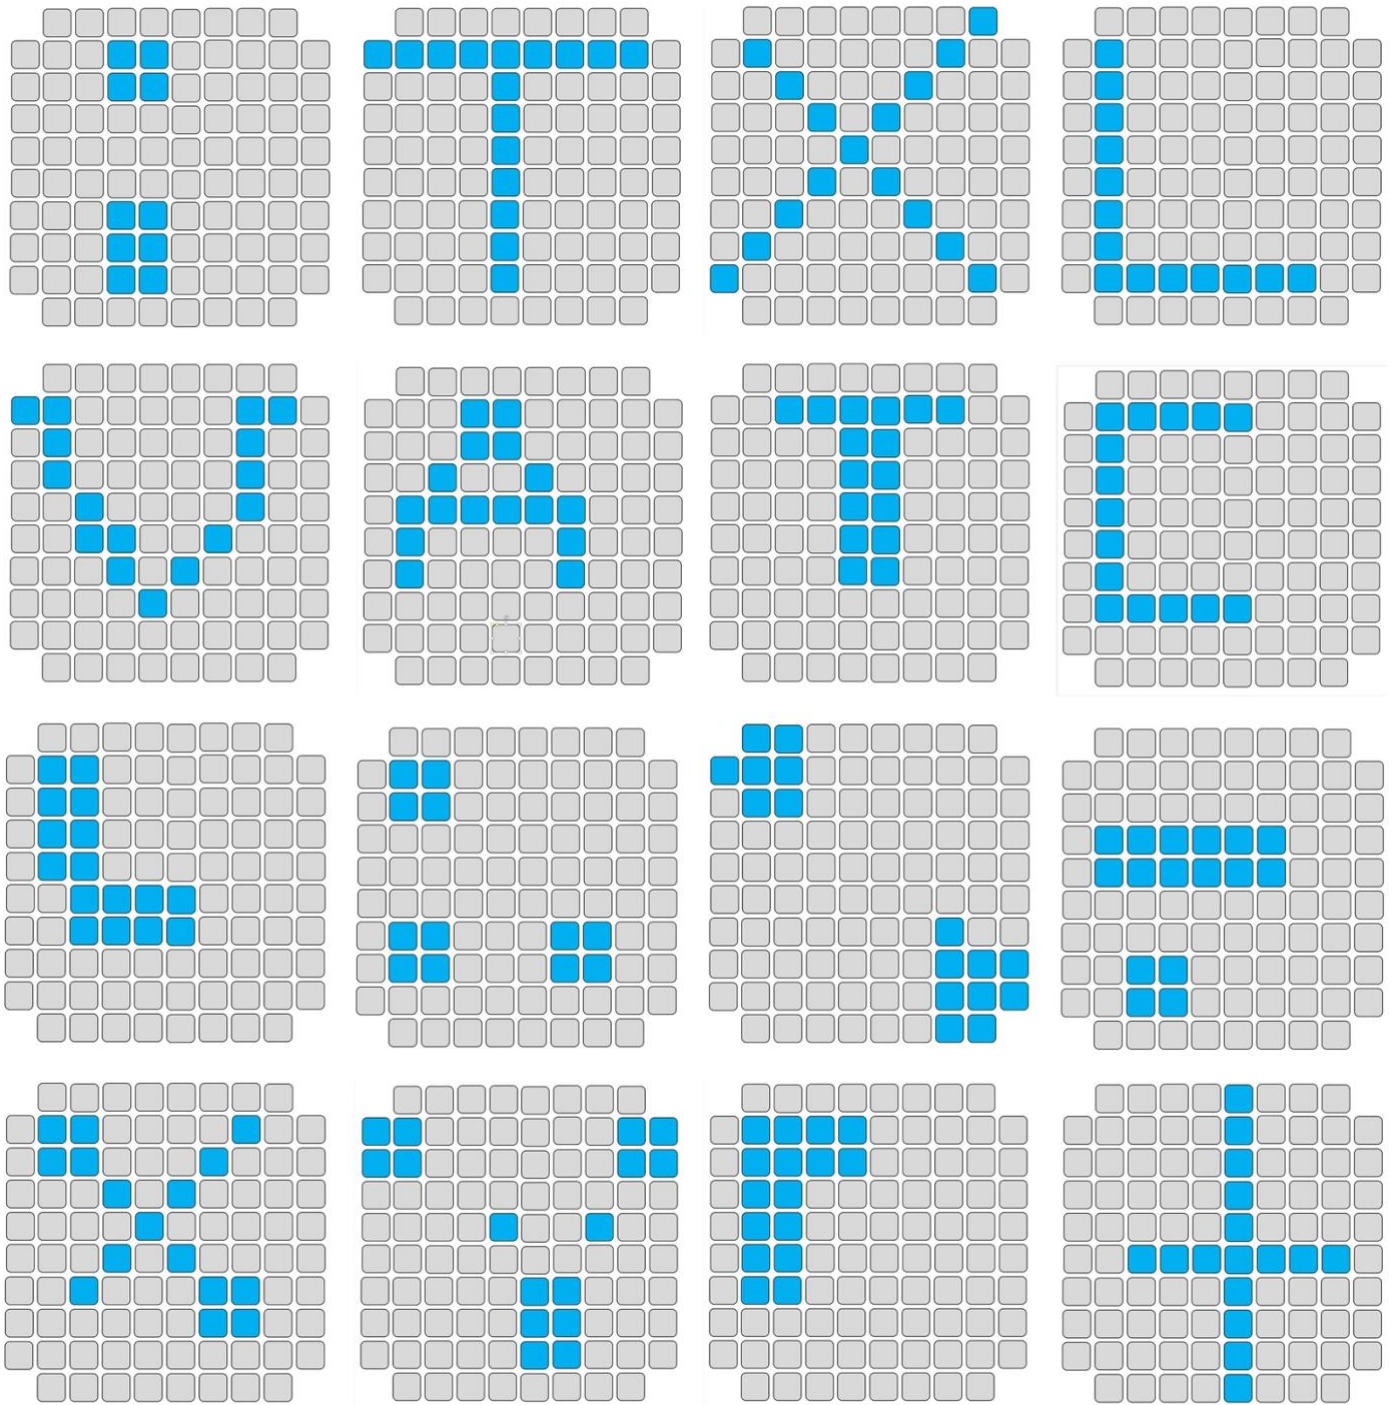

**Supplementary Figure 2.** Examples of multi-electrode stimulation patterns that were used when attempting to induce letter percepts. Most of them were not recognized as letters by our subject, therefore we only tried them for a few trials.
